# Supplementary material
Source: publisher site journal article supplement (https://www.dovepress.com/get_supplementary_file.php?f=461289.docx)
Supplement: Supplementary file 1 [file get_supplementary_file.php]

Supplementary Table.1 **Diseases potentially associated with selected circRNAs**

| Gene Name | Species | Disease associations for selected gene | Aliases |
| --- | --- | --- | --- |
|
| CircIGF2BP3 | human | 1.[Langerhans Cell Sarcoma](http://www.malacards.org/card/langerhans_cell_sarcoma);  2.[Breast Cancer](http://www.malacards.org/card/breast_cancer);  3.[Barrett Esophagus](http://www.malacards.org/card/barrett_esophagus);  4.[Pilomyxoid Astrocytoma](http://www.malacards.org/card/pilomyxoid_astrocytoma) | 1.Malignant Langerhans Cell Sarcoma;  2.Breast Carcinoma;  3.Barrett'S Esophagus;  4.NA |
| CircFOXK2 | human | 1.[Lung Cancer](http://www.malacards.org/card/lung_cancer);  2.[Bainbridge-Ropers Syndrome](http://www.malacards.org/card/bainbridge_ropers_syndrome) | 1.Lung Carcinoma;  2.Severe Feeding Difficulties-Failure To Thrive-Microcephaly Due To Asxl3 Deficiency |
| CircHST15 | human | 1.[Spondyloepiphyseal Dysplasia With Congenital Joint Dislocations](http://www.malacards.org/card/spondyloepiphyseal_dysplasia_with_congenital_joint_dislocations);  2.[Larsen Syndrome](http://www.malacards.org/card/larsen_syndrome) | 1.Spondyloepiphyseal Dysplasia;  2.Larsen Syndrome, Dominant Type |
| CircPRDM4 | human | 1.[Porokeratosis](http://www.malacards.org/card/porokeratosis) | 1.Disseminated Superficial Actinic Porokeratosis |
| CircMYO1C | human | [1.Granulomatous Amebic Encephalitis](http://www.malacards.org/card/granulomatous_amebic_encephalitis);  2.[Chromosome 17p13.3, Centromeric, Duplication Syndrome](http://www.malacards.org/card/chromosome_17p133_centromeric_duplication_syndrome);  3.[Primary Amebic Meningoencephalitis](http://www.malacards.org/card/primary_amebic_meningoencephalitis);  4.[Myopathy, Centronuclear](http://www.malacards.org/card/myopathy_centronuclear_1);  5.[Miller-Dieker Lissencephaly Syndrome](http://www.malacards.org/card/miller_dieker_lissencephaly_syndrome) | 1.Granulomatous Amoebic Encephalitis；  2.Chromosome 17p13.3 Duplication Syndrome；  3.Naegleria Fowleri Infection;  4.Autosomal Dominant Centronuclear Myopathy;  5.Miller-Dieker Syndrome |
| Circ-VIM | human | 1.[Cataract 30, Multiple Types](http://www.malacards.org/card/cataract_30_multiple_types);  2.[Premature Aging](http://www.malacards.org/card/premature_aging) | 1.Cataract 30 Pulverulent;  2.Syndrome With Premature-Aging |
| Circ-CPA4 | human | 1.[Thiopental Allergy](http://www.malacards.org/card/thiopental_allergy);  2.[Esophagitis, Eosinophilic](http://www.malacards.org/card/esophagitis_eosinophilic_1) | 1.Penthiobarbital Allergy;  2.Eosinophilic Esophagitis |

NA: Not Applicable.
